# Supplementary material for: Multi-Omics Analysis of Low-Temperature Fruiting Highlights the Promising Cultivation Application of the Nutrients Accumulation in Hypsizygus marmoreus
Source: MDPI journal article supplement (doi:10.3390/jof8070695), 2022-06-30
Supplement: s1 [file s1]

## Supplementary material

### *Amino acid-targeted metabolome of the developmental stages of *H. marmoreus**

An amino acid-targeted metabolome was used to analyse the metabolites of the nine developmental stages of *H. marmoreus*. There were six biological replicates in this study. A 15 mg tissue sample was transferred into a 2 mL EP tube with 200  $\mu$ L 10% formic acid methanol solution-ddH<sub>2</sub>O (1:1. VVV) solution and 50 mg glass beads. Then, the mixed sample was put into the high-throughput tissue grinding machine and shaken at 60 Hz for 1 min, which was repeated twice. Thirty microlitres of supernatant were obtained and then added to 120  $\mu$ L of 10% formic acid-methanol solution-ddH<sub>2</sub>O (1:1. VVV) and vortexed for 30 s. One hundred microlitres of the diluted sample were obtained, and then 100  $\mu$ L of 100 ppb dual-isotope internal standard was added and vortexed for 30 s. The supernatant was filtered through a 0.22  $\mu$ m membrane, and the collected filtrate was added to the test bottle.

Chromatographic separation was accomplished in a Waters ACQUITY UPLC. Chromatographic conditions: chromatography column Agilent HP-INNOWAX capillary column (30 m  $\times$  0.25 mm ID  $\times$  0.25  $\mu$ m); shunt injection, injection volume 1  $\mu$ L, shunt ratio 10:1, injector temperature 250  $^{\circ}$ C; ion source temperature 230  $^{\circ}$ C; transmission line temperature 250  $^{\circ}$ C; quadrupole temperature 150  $^{\circ}$ C. The temperature program started at 90  $^{\circ}$ C; then, the temperature was heated to 120  $^{\circ}$ C at 10  $^{\circ}$ C/min. Then, the temperature was heated to 150  $^{\circ}$ C at 5  $^{\circ}$ C/min. Finally, the temperature was heated to 250  $^{\circ}$ C at 25  $^{\circ}$ C/min for 2 min. The carrier gas was helium, and the carrier gas flow rate was 1.0 mL/min. Mass spectrometric (MS) detection was executed on an AB 4000 triple quadrupole mass spectrometer with an electrospray ionization (ESI) source and positive ion ionization mode. The ion source temperature was 500  $^{\circ}$ C, the ion source voltage was 5500 V, the collision gas was 6 psi, the curtain gas was 30 psi, and the atomization gas and auxiliary gas were 50 psi. Multiple response monitoring (MRM) was used for scanning.

The appropriate amount of 22 kinds of standard amino acids was weighed and dissolved in methanol or water to prepare a single standard mother liquor. A proper amount of each mother liquor was taken to make a mixed standard, diluted with water to the appropriate concentration to obtain a standard solution. LC-MS detection was performed for each standard solution and the treated samples. Shanghai Personal Biotechnology Co. implemented the LC-MS detection. The pheatmap program package in R (V3.3.2) was used for agglomerate hierarchical data clustering. After the datasets were standardized, multivariate statistical analysis was performed. The R language ropls package was used for principal component analysis (PCA). Single-dimensional statistical analysis included Student's t-test and fold change. The volcano plot was obtained by R software. The standard for differential metabolites was  $p$ -value  $\leq 0.05$  and VIP (variable importance for the projection)  $\geq 1$ .

### *Organic acid targeted metabolome detection*

An organic acid-targeted metabolome was used to analyse the metabolites of nine developmental stages of *H. marmoreus*. There were six biological replicates in this study. Twenty-six kinds of organic acid standard substances were weighed, and the single standard mother liquor was prepared with methanol or water to make a mixed standard. A 30% methanol aqueous solution (containing 0.1% formic acid) was diluted to make a standard working solution, which was stored at 0  $^{\circ}$ C until LC-MS detection.

Fifty milligrams of tissue sample were weighed into a 2 mL EP tube, and a steel ball was added along with 500  $\mu$ L of 30% methanol aqueous solution (containing 0.1% formic acid). Then, the samples were ground with a high-throughput tissue grinder at 60 Hz for 120 s and centrifuged at 12000 rpm at 4  $^{\circ}$ C for 10 min, and the supernatant was added to the detection bottle. The extraction of metabolites was performed according to the methods described in previous research [1]. An ACQUITY UPLC<sup>®</sup> BEH C18 column (2.1 $\times$ 100 mm, 1.7  $\mu$ m, Waters Inc., Milford, Massachusetts, USA) was used for chromatographic determination. The sample size was 5  $\mu$ L, the column temperature was 40  $^{\circ}$ C, and the mobile phases were A-water (containing 0.1% formic acid) and B-methanol water (containing 0.1% formic acid). Multiple response monitoring (MRM) was used for scanning. Previous research explicitly referred to the chromatographic and mass spectrometric conditions for computer detection [2,3]. Organic acid-targeted metabolome detection was implemented by Shanghai Personal Biotechnology Co. Ltd. The Z score (standard score) is a conversion based on the number of metabolites and is used to measure the number

of metabolites at the same level. The Z score is calculated based on the mean and standard deviation of the control group and is calculated as  $Z = (x - \mu)/\sigma$ .  $x$  is a specific score,  $\mu$  is the mean, and  $\sigma$  is the standard deviation.

## References

1. Pawlak, M.; Klupczynska, A.; Kokot, Z.J.; Matysiak, J. Extending Metabolomic Studies of *Apis mellifera* Venom: LC-MS-Based Targeted Analysis of Organic Acids. *Toxins* **2019**, *12*, 14.
2. Langfelder, P.; Horvath, S. WGCNA: An R package for weighted correlation network analysis. *BMC Bioinform.* **2008**, *9*, 559.
3. Liang, Y.; Wang, S.; Zhao, C.; Ma, X.; Zhao, Y.; Shao, J.; Li, Y.; Li, H.; Song, H.; Ma, H.; Li, H.; Zhang, B.; Zhang, L. Transcriptional regulation of bark freezing tolerance in apple (*Malus domestica* Borkh.). *Hortic. Res.* **2020**, *7*, 205.

**Table S1** Primers used for qPCR.

**Table S2** KEGG enrichment analysis of the DEGs in LR30 vs. PSR.

**Table S3** Correlation analysis of differentially expressed genes (DEGs) and significantly different AAs (SDAs) in OG vs. PS. The associated AAs obtained by correlation analysis of DEGs and SDAs.

**Table S4** The associated enzymes obtained by correlation analysis of DEGs and SDAs.

**Table S5** KEGG annotation of arginine biosynthesis.

**Fig. S1** Unique molecular identifier (UMI) absolute quantitative transcriptome analysis of developmental stages of *H. marmoreus*. (A) Principal component analysis (PCA) of the expressed genes. (B) Heatmap analysis of DEGs. (C) Venn diagram analysis of DEGs. (D) (E) KEGG pathway enrichment of DEGs in OG vs. PS.

**Fig. S2** Heatmap analysis of gene expression in the ribosomal pathways.

**Fig. S3** KEGG enrichment analysis of the DEGs in LR30\_vs\_PS.

**Fig. S4** KEGG enrichment analysis of the DEGs in OG vs. LR30.

**Fig. S5** Expression profile of the amino acid metabolism pathway in low-temperature fruiting after long postripening (LFLP) in *H. marmoreus*. (A) Heatmap analysis of the amino acid metabolism pathway in the LFLP in *H. marmoreus*. (B) The enrichment

analysis of the upregulated DEGs in the postripening growth stages. (C) The enrichment analysis of the upregulated DEGs in reproductive growth stages.

**Fig. S6** Targeted profiling of the amino acid metabolome of different developmental stages of *H. marmoreus*. (A) Analysis of total amino acid (AA) content in different developmental stages of *H. marmoreus*. (B) Analysis of each AA content in different developmental stages of *H. marmoreus*.

**Fig. S7** PCA of the AAs in the developmental stages of *H. marmoreus*.

**Fig. S8** UMI absolute quantitative transcriptome analysis of the developmental stages of *H. marmoreus*, including the substrates of the reproductive growth stage (SRG). (A) PCA of the AAs in the developmental stages of *H. marmoreus*. (B) Heatmap analysis showed the apparent difference in the expression profile in the developmental stages of *H. marmoreus*.

**Fig. S9** KEGG enrichment analysis of the DEGs in PSR vs. DSR.

**Fig. S10** pH value of substrates in the developmental stages of *H. marmoreus*. The pH values of the substrates from the upper, middle, and lower parts of the cultivation bottle were measured.

**Fig. S11** Heatmap analysis of the expression of citrate cycle in the developmental stages of *H. marmoreus*.

**Fig. S12** Heatmap analysis of organic acids in the postripening stage (PRS) and SRG.

**Fig. S13** WGCNA of the AA-targeted metabolome and transcriptome. (A) Hierarchical cluster dendrogram showing coexpressed modules and a module trait heatmap. Each leaf on the tree represents a gene. Each coloured row indicates a

colour-coded module that contains a group of highly interconnected genes. (B) Heatmap showing the correlation between the modules and AAs. Each row corresponds to a module, whereas each column corresponds to an AA. The correlation coefficient between a given module and an AA is indicated by the colour of the cell at the row-column intersection. Blue and red indicate positive and negative correlations, respectively. (C) The hub genes in the pink modules. (D) Heatmap of the hub genes in the pink module. (E) Enrichment analysis of the genes in the pink modules.

**Fig. S14** qPCR analysis of GCN2 and eIF2 in the 4 °C cold stress experiment of *H. marmoreus* mycelia.

**Table S1** Primers used for qPCR

| Gene              | Primer (5' to 3')    |
|-------------------|----------------------|
| Actin-1-F         | CCGAGCGGAAGTACTCTGTG |
| Actin-1-R         | ATGCTATCTTGCCTCCAGCC |
| scaffold1.g953-F  | TCTGAAACTGGCGAGCACAT |
| scaffold1.g953-R  | GAGAGCGCGACGATACTTGA |
| scaffold1.g45-F   | GCCGCAAGAACTCAAGCAA  |
| scaffold1.g45-R   | CTGCAAGGTTAGAGGTGGGG |
| scaffold13.g118-F | CATCCCAACTCCACCCTCAC |
| scaffold13.g118-R | GGGCCTCCGTAATAGCTTCC |
| scaffold3.g243-F  | AATCGCTCCACCCTCAATCC |
| scaffold3.g243-R  | CGTCTACGCTTCCCGTTGTA |

**Table S2 KEGG enrichment analysis of the DEGs in LR30 vs. PSR**

| PathwayID | Pathway                                             | Up_number | Down_number | Total_number | Pvalue    |
|-----------|-----------------------------------------------------|-----------|-------------|--------------|-----------|
| ko03010   | Ribosome                                            | 26        | 10          | 84           | 2.268E-08 |
| ko04141   | Protein processing in endoplasmic reticulum         | 1         | 29          | 88           | 8.165E-05 |
| ko00500   | Starch and sucrose metabolism                       | 19        | 1           | 50           | 0.0001073 |
| ko00040   | Pentose and glucuronate interconversions            | 9         | 2           | 25           | 0.0015746 |
| ko00072   | Synthesis and degradation of ketone bodies          | 1         | 3           | 6            | 0.0097867 |
| ko00511   | Other glycan degradation                            | 5         | 0           | 9            | 0.0102632 |
| ko00460   | Cyanoamino acid metabolism                          | 7         | 0           | 16           | 0.0119186 |
| ko00520   | Amino sugar and nucleotide sugar metabolism         | 10        | 8           | 62           | 0.0141258 |
| ko00280   | Valine, leucine and isoleucine degradation          | 1         | 11          | 37           | 0.0175387 |
| ko03060   | Protein export                                      | 0         | 7           | 18           | 0.0242254 |
| ko00900   | Terpenoid backbone biosynthesis                     | 3         | 5           | 22           | 0.0249199 |
| ko00650   | Butanoate metabolism                                | 1         | 5           | 15           | 0.0315892 |
| ko00910   | Nitrogen metabolism                                 | 6         | 1           | 20           | 0.0432225 |
| ko00051   | Fructose and mannose metabolism                     | 5         | 3           | 25           | 0.0525256 |
| ko00680   | Methane metabolism                                  | 4         | 3           | 22           | 0.0698304 |
| ko00400   | Phenylalanine, tyrosine and tryptophan biosynthesis | 2         | 4           | 18           | 0.0743108 |
| ko00020   | Citrate cycle (TCA cycle)                           | 1         | 6           | 23           | 0.0861101 |
| ko00360   | Phenylalanine metabolism                            | 1         | 5           | 19           | 0.0934619 |
| ko01040   | Biosynthesis of unsaturated fatty acids             | 2         | 4           | 19           | 0.0934619 |
| ko00620   | Pyruvate metabolism                                 | 5         | 5           | 39           | 0.1205736 |
| ko00600   | Sphingolipid metabolism                             | 2         | 3           | 16           | 0.1262228 |
| ko00130   | Ubiquinone and other terpenoid-quinone biosynthesis | 1         | 2           | 8            | 0.1454938 |

|         |                                                            |   |    |    |           |
|---------|------------------------------------------------------------|---|----|----|-----------|
| ko00630 | Glyoxylate and dicarboxylate metabolism                    | 3 | 4  | 26 | 0.1464871 |
| ko00052 | Galactose metabolism                                       | 5 | 0  | 18 | 0.1857701 |
| ko00603 | Glycosphingolipid biosynthesis - globo and isoglobo series | 2 | 0  | 5  | 0.2072229 |
| ko00010 | Glycolysis / Gluconeogenesis                               | 5 | 4  | 39 | 0.2183358 |
| ko00190 | Oxidative phosphorylation                                  | 1 | 13 | 66 | 0.2368365 |
| ko00640 | Propanoate metabolism                                      | 1 | 3  | 16 | 0.2924136 |
| ko03018 | RNA degradation                                            | 1 | 9  | 48 | 0.3073724 |
| ko04213 | Longevity regulating pathway - multiple species            | 2 | 4  | 27 | 0.3166635 |
| ko00220 | Arginine biosynthesis                                      | 2 | 2  | 17 | 0.3347534 |
| ko00860 | Porphyrin and chlorophyll metabolism                       | 0 | 4  | 17 | 0.3347534 |
| ko04146 | Peroxisome                                                 | 2 | 9  | 55 | 0.3447202 |
| ko03450 | Non-homologous end-joining                                 | 3 | 0  | 13 | 0.3938828 |
| ko00790 | Folate biosynthesis                                        | 3 | 0  | 13 | 0.3938828 |
| ko00100 | Steroid biosynthesis                                       | 0 | 5  | 24 | 0.3999146 |
| ko02010 | ABC transporters                                           | 1 | 1  | 8  | 0.4131598 |
| ko00670 | One carbon pool by folate                                  | 1 | 1  | 8  | 0.4131598 |
| ko00250 | Alanine, aspartate and glutamate metabolism                | 3 | 3  | 30 | 0.4164648 |
| ko00592 | alpha-Linolenic acid metabolism                            | 0 | 1  | 3  | 0.4331871 |
| ko00270 | Cysteine and methionine metabolism                         | 2 | 6  | 42 | 0.4400555 |
| ko00230 | Purine metabolism                                          | 6 | 2  | 42 | 0.4400555 |
| ko00350 | Tyrosine metabolism                                        | 1 | 2  | 14 | 0.4438349 |
| ko00510 | N-Glycan biosynthesis                                      | 0 | 6  | 31 | 0.4496102 |
| ko00330 | Arginine and proline metabolism                            | 0 | 6  | 31 | 0.4496102 |
| ko00260 | Glycine, serine and threonine metabolism                   | 2 | 5  | 37 | 0.4597812 |
| ko00750 | Vitamin B6 metabolism                                      | 0 | 1  | 4  | 0.5309692 |
| ko00513 | Various types of N-glycan biosynthesis                     | 0 | 4  | 23 | 0.5782363 |
| ko00062 | Fatty acid elongation                                      | 0 | 1  | 5  | 0.6119058 |
| ko00430 | Taurine and hypotaurine metabolism                         | 1 | 0  | 5  | 0.6119058 |
| ko00071 | Fatty acid degradation                                     | 1 | 3  | 24 | 0.6139007 |
| ko00030 | Pentose phosphate pathway                                  | 3 | 1  | 24 | 0.6139007 |

|         |                      |   |   |    |           |
|---------|----------------------|---|---|----|-----------|
| ko00340 | Histidine metabolism | 2 | 2 | 24 | 0.6139007 |
|---------|----------------------|---|---|----|-----------|

**Table S3**

| <b>CompoundID</b> | <b>Description</b> | <b>Number</b> | <b>Pathway</b> |
|-------------------|--------------------|---------------|----------------|
| C00025            | Glu                | 30            | 33             |
| C00073            | Met                | 13            | 6              |
| C00037            | Gly                | 11            | 15             |
| C00047            | Lys                | 11            | 7              |
| C00064            | Gln                | 10            | 15             |
| C00049            | Asp                | 9             | 17             |
| C00334            | GABA               | 7             | 11             |
| C00065            | Ser                | 5             | 14             |
| C00188            | Thr                | 5             | 8              |
| C00135            | His                | 5             | 6              |
| C00407            | Ile                | 4             | 9              |
| C00123            | Leu                | 4             | 8              |
| C00041            | Ala                | 3             | 11             |
| C00152            | Asn                | 3             | 6              |
| C00062            | Arg                | 3             | 12             |



**Table S4**

| <b>EC</b> | <b>Annotation</b>           | <b>Number</b> | <b>Associated compoundID</b> |
|-----------|-----------------------------|---------------|------------------------------|
| 2.1.1.-   | Methyltransferase           | 10            | C00073;C00135                |
| 2.3.1.-   | Acetyltransferase           | 8             | C00037;C00047                |
| 2.6.1.42  | Aminotransferase            | 8             | C00183;C00407;C00123;C00025  |
| 6.3.5.4   | Asparagine synthase         | 8             | C00152;C00049;C00064;C00025  |
| 1.2.1.3   | Aldehyde dehydrogenase      | 6             | C00334                       |
| 3.5.1.-   | Amidohydrolase              | 6             | C00047                       |
| 4.1.3.27  | Anthranilate synthase       | 4             | C00064;C00025                |
| 6.3.5.1   | Glutamine-hydrolysing       | 4             | C00064;C00025                |
| 4.1.1.15  | Glutamate decarboxylase     | 3             | C00334;C00049;C00025         |
| 3.4.-.-   | Assembly-enhancing protease | 3             | C00188                       |
| 6.1.1.12  | Aspartyl-tRNA synthetase    | 3             | C00049                       |
| 2.6.1.1   | Aminotransferase            | 3             | C00049;C00025;C00082         |

**Table S5**

| <b>ID</b>       | <b>KO</b> | <b>EC</b> | <b>Definition</b>                                                       |
|-----------------|-----------|-----------|-------------------------------------------------------------------------|
| scaffold5.g62   | K01940    | 6.3.4.5   | Argininosuccinate synthase                                              |
| scaffold9.g163  | K01476    | 3.5.3.1   | Arginase                                                                |
| scaffold10.g18  | K00611    | 2.1.3.3   | Ornithine carbamoyltransferase                                          |
| scaffold33.g38  | K00814    | 2.6.1.2   | Alanine transaminase                                                    |
| scaffold3.g399  | K15371    | 1.4.1.2   | Glutamate dehydrogenase                                                 |
| scaffold24.g62  | K01941    | 6.3.4.6   | Urea carboxylase                                                        |
| scaffold1.g1037 | K01968    | 6.4.1.4   | 3-methylcrotonyl-coa carboxylase alpha subunit                          |
| scaffold5.g166  | K01958    | 6.4.1.1   | Pyruvate carboxylase                                                    |
| scaffold5.g358  | K11262    | 6.4.1.2   | Acetyl-coa carboxylase / biotin carboxylase 1                           |
| scaffold4.g68   | K14454    | 2.6.1.1   | Aspartate aminotransferase, cytoplasmic                                 |
| scaffold1.g592  | K14455    | 2.6.1.1   | Aspartate aminotransferase, mitochondrial                               |
| scaffold2.g414  | K01915    | 6.3.1.2   | Glutamine synthetase                                                    |
| scaffold2.g415  | K01915    | 6.3.1.2   | Glutamine synthetase                                                    |
| scaffold4.g71   | K01755    | 4.3.2.1   | Argininosuccinate lyase                                                 |
| scaffold22.g107 | K00262    | 1.4.1.4   | Glutamate dehydrogenase (NADP <sup>+</sup> )                            |
| scaffold18.g129 | K12659    | 2.7.2.8   | N-acetyl-gamma-glutamyl-phosphate reductase /<br>acetylglutamate kinase |
| scaffold2.g682  | K00818    | 2.6.1.11  | Acetylornithine aminotransferase                                        |
| scaffold15.g113 | K00620    | 2.3.1.1   | Glutamate n-acetyltransferase / amino-acid<br>n-acetyltransferase       |

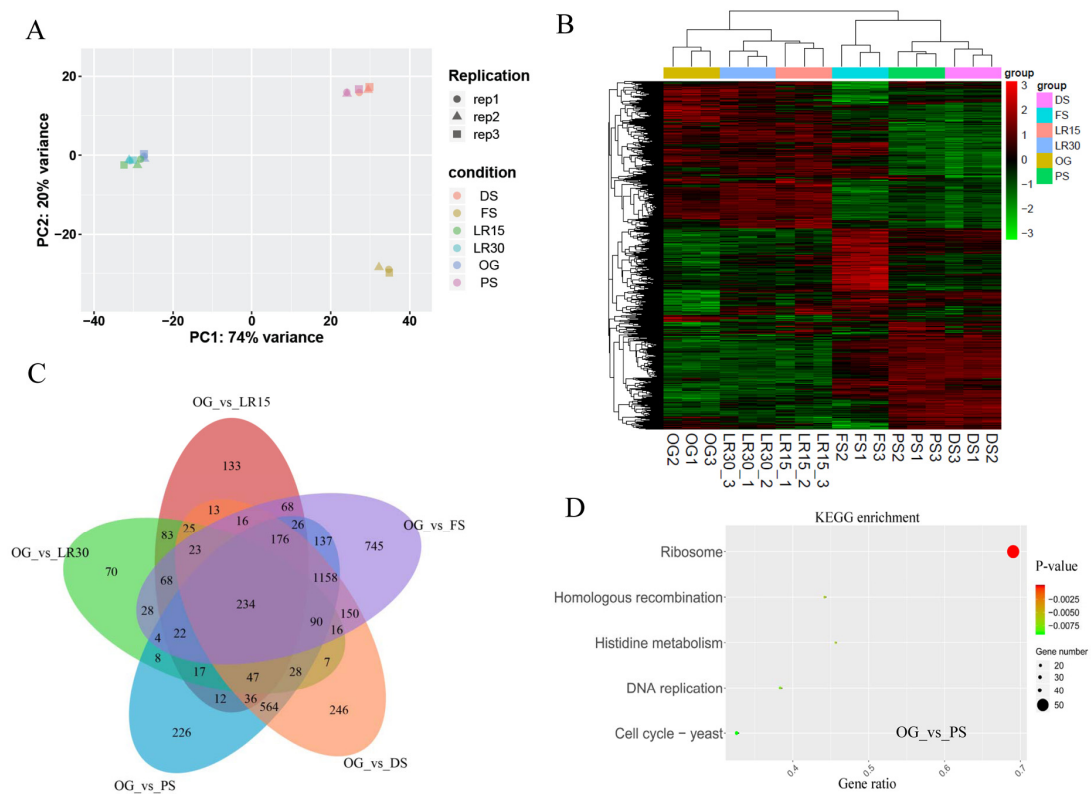

**Fig. S1**

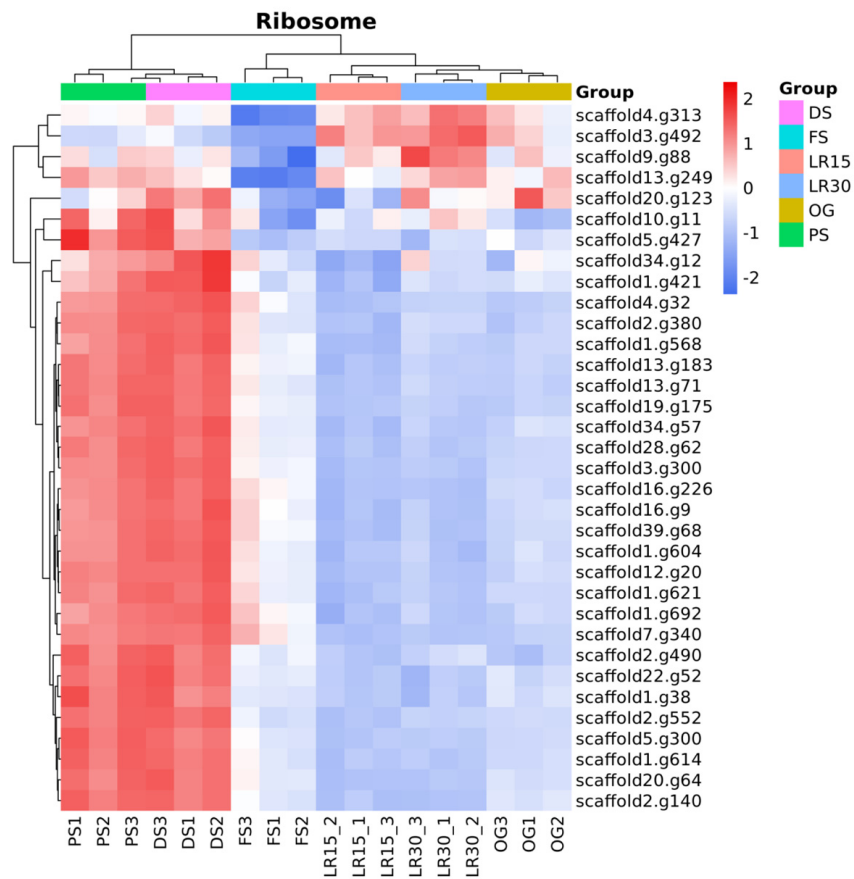

**Fig. S2**

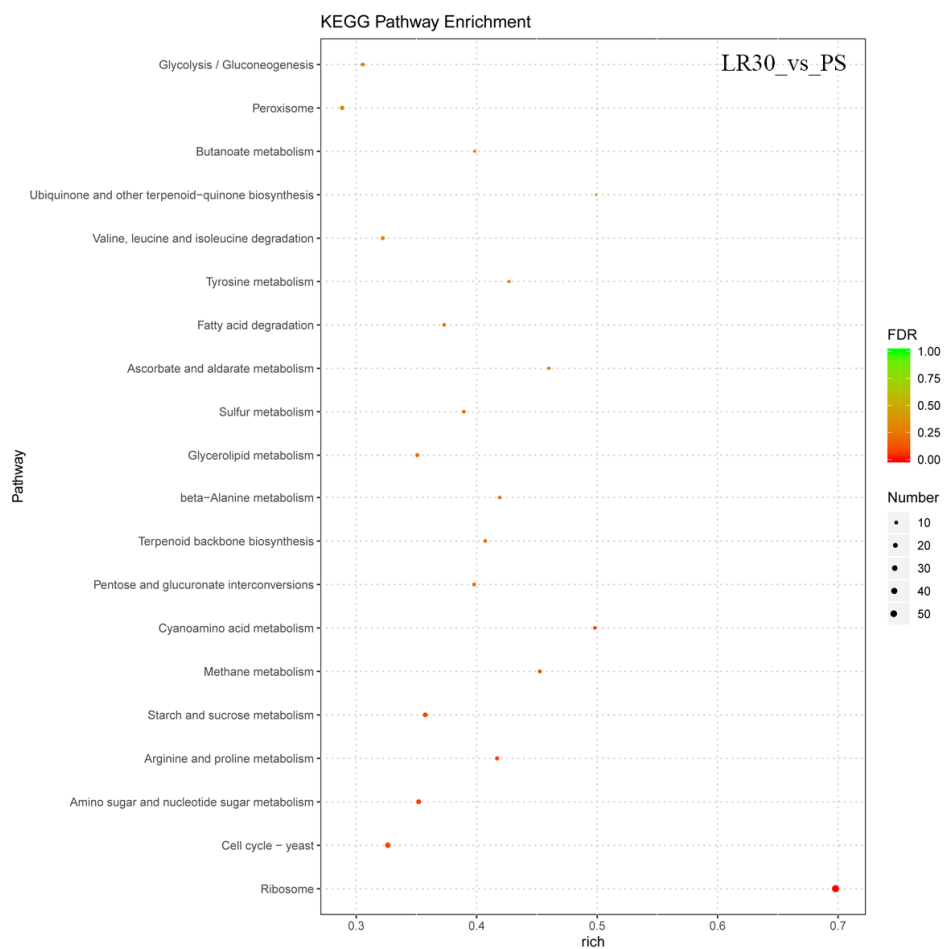

Fig. S3

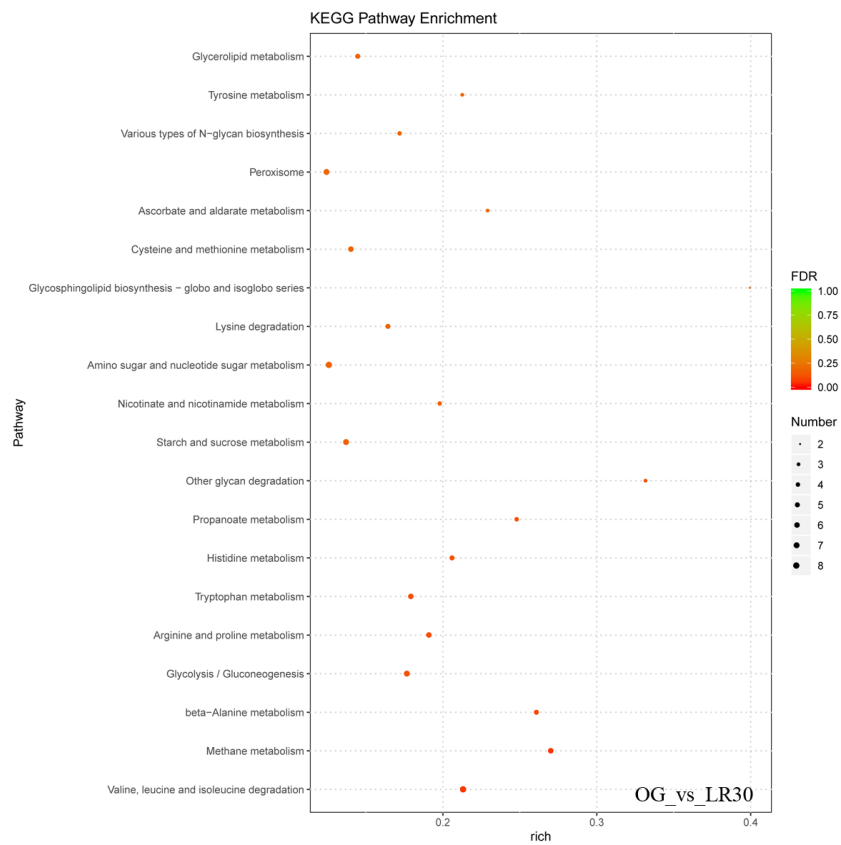

**Fig. S4**

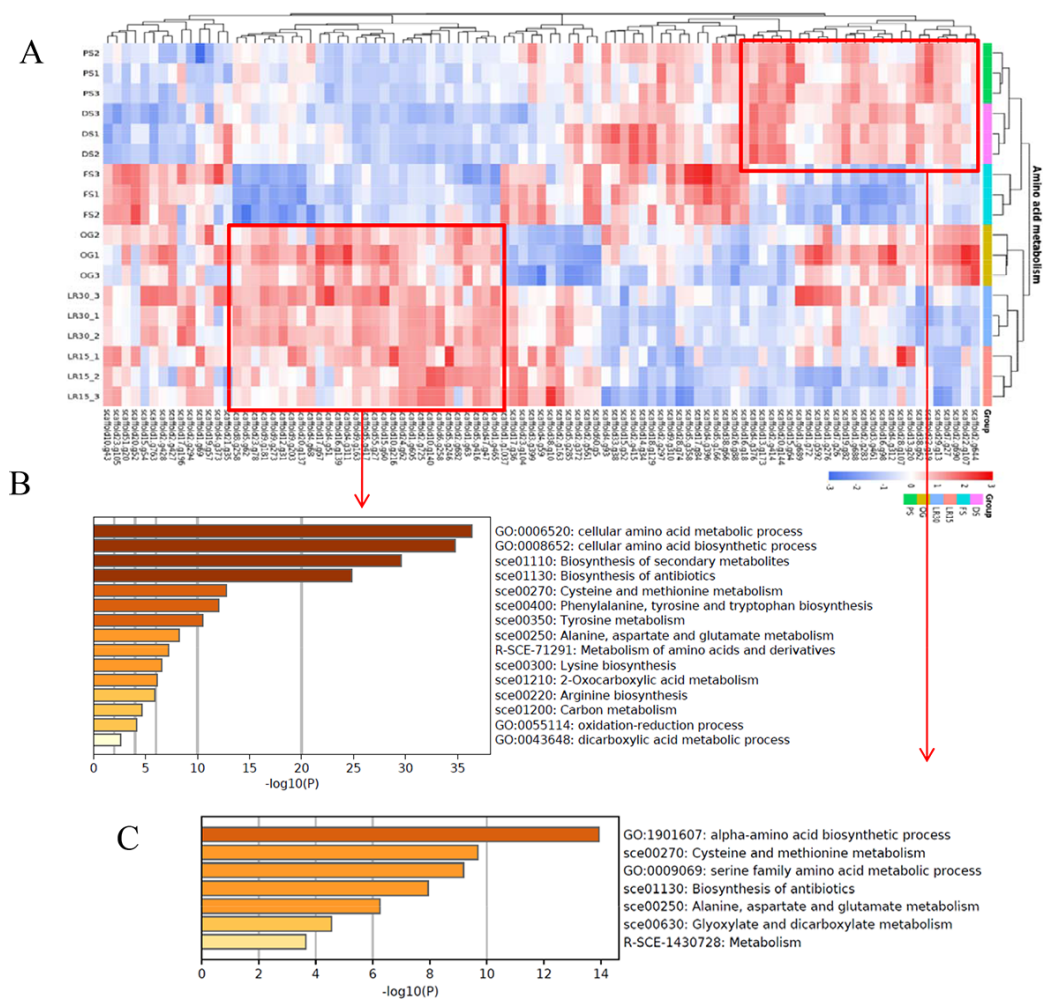

**Fig. S5**

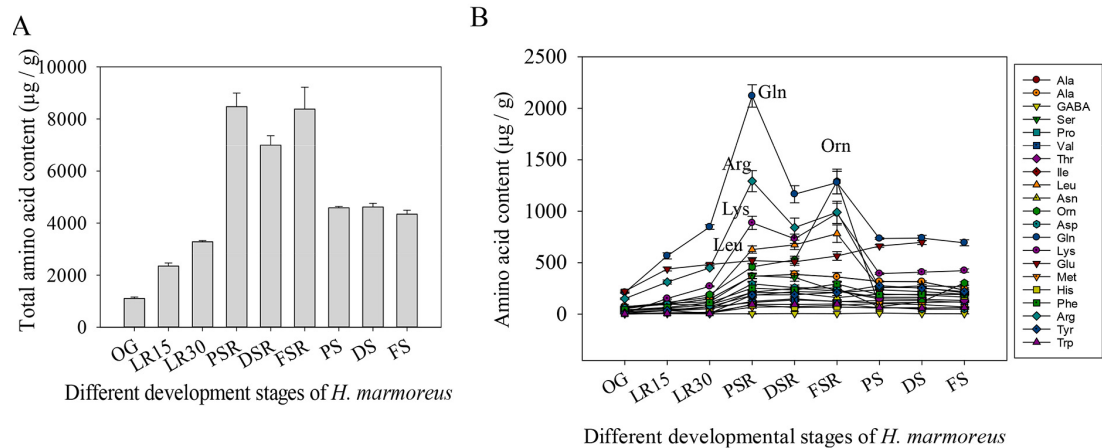

**Fig. S6**



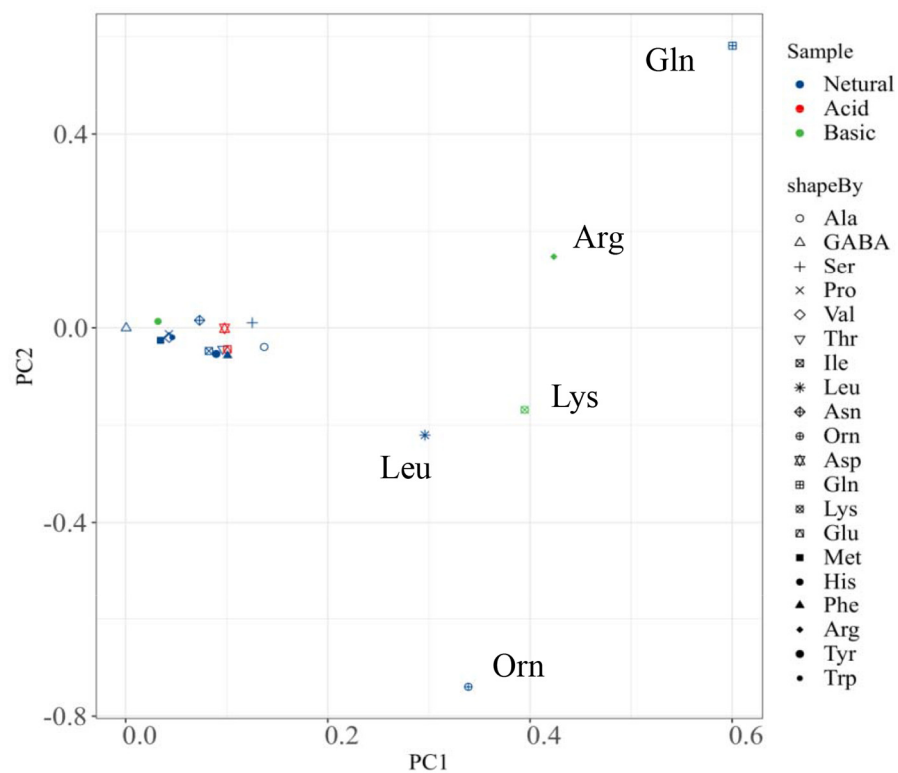

**Fig. S7**

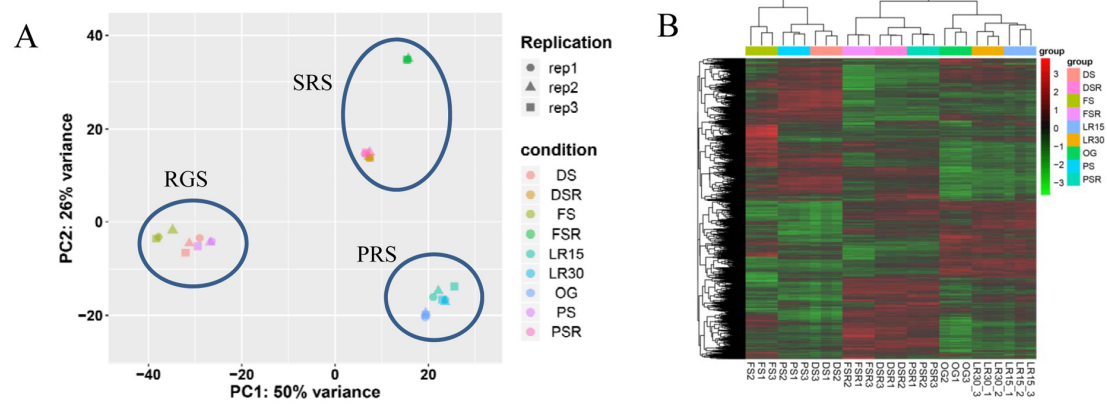

**Fig. S8**

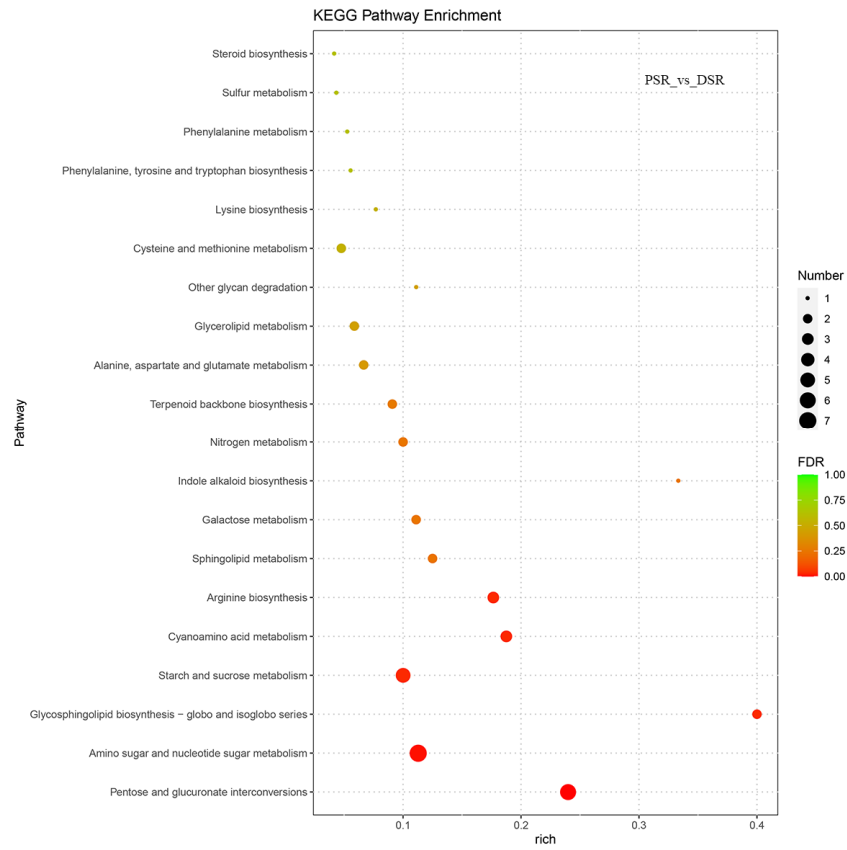

Fig. S9

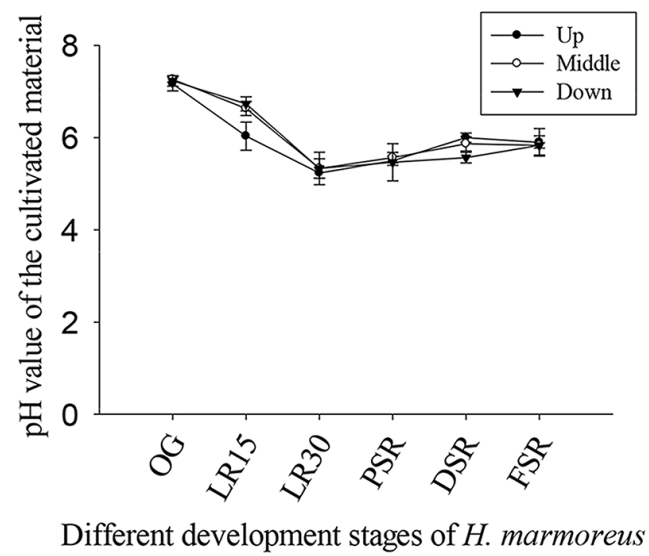

**Fig. S10**

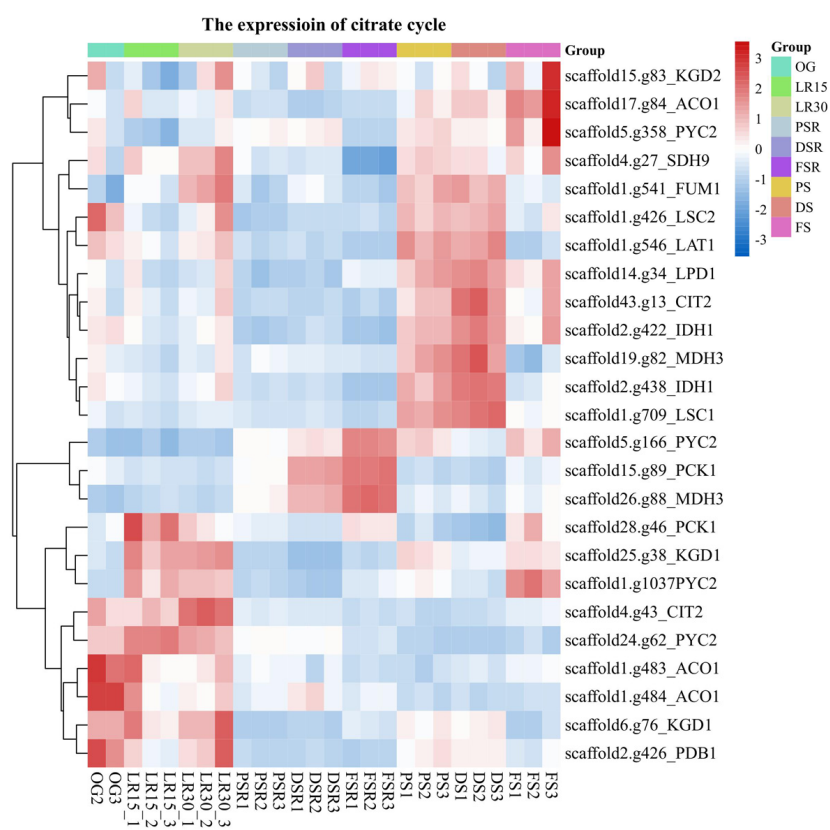

**Fig. S11**

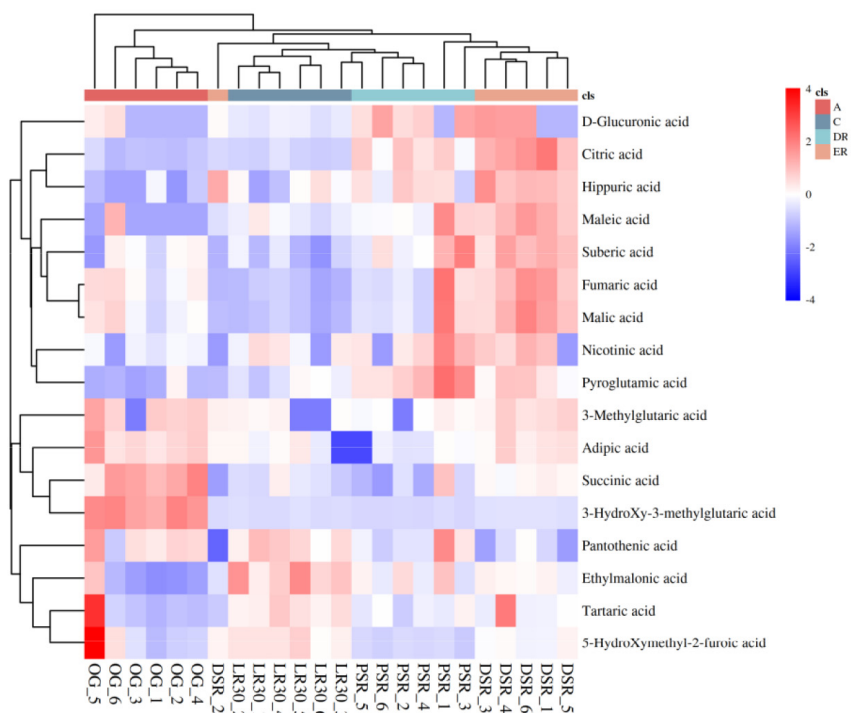

**Fig. S12**

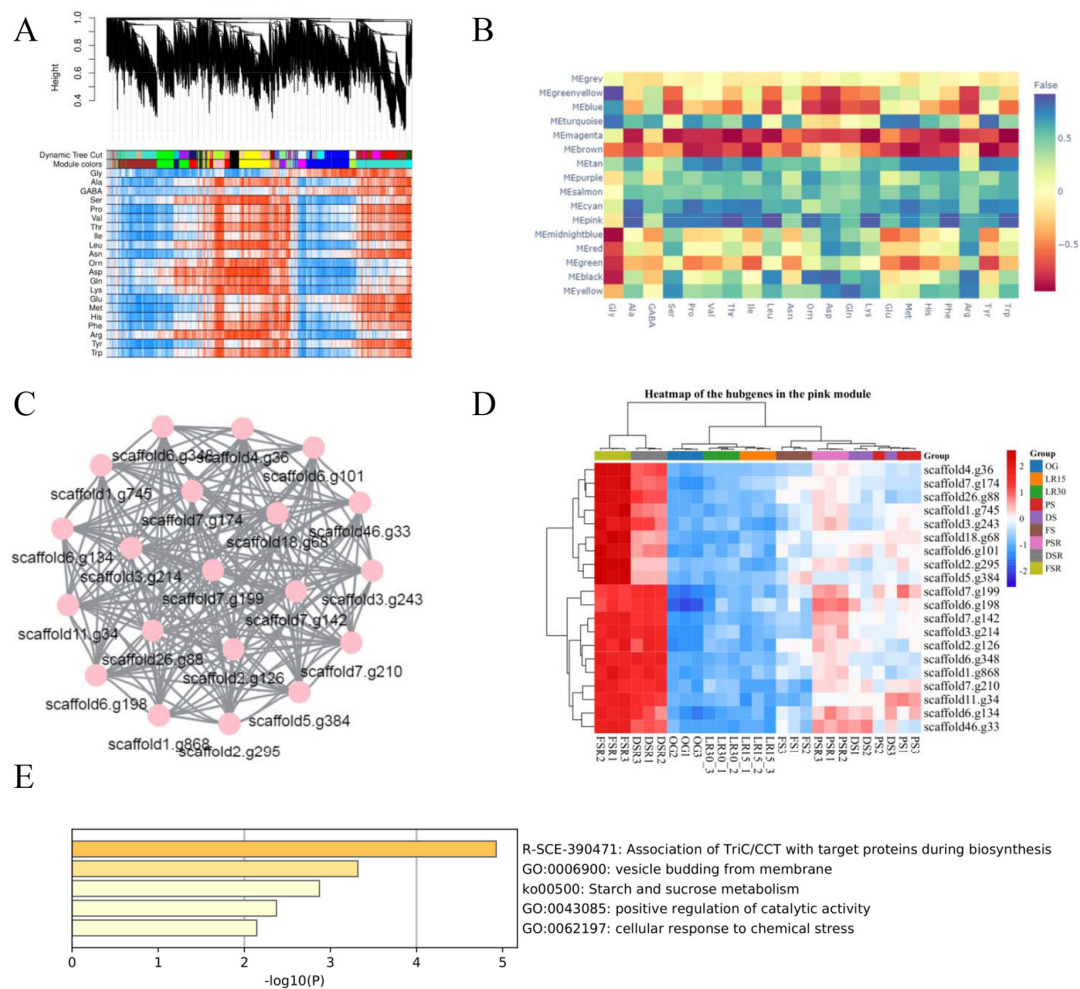

**Fig. S13**

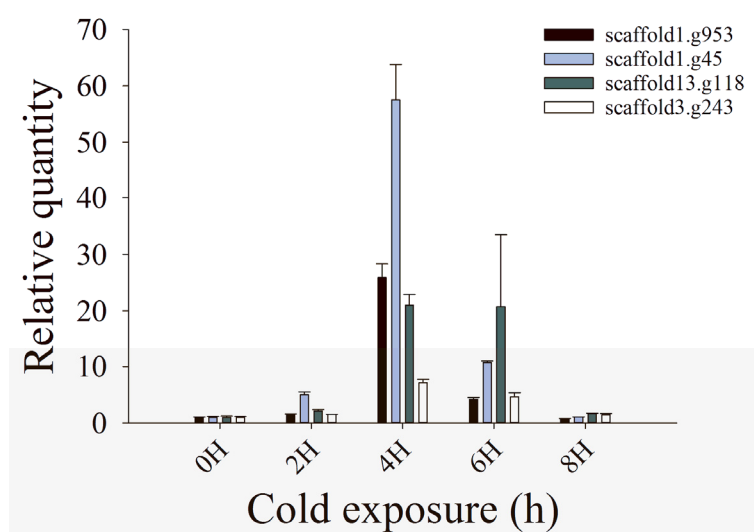

**Fig. S14**
